# Supplementary material for: 5-Hydroxymethylcytosine Is Not Present in Appreciable Quantities in Arabidopsis DNA
Source: PubMed Central journal article supplement (PMC4291460; doi:10.1534/g3.114.014670), 2014-11-06
Supplement: supp_g3.114.014670_FigureS2.pdf [file supp_g3.114.014670_FigureS2.pdf]

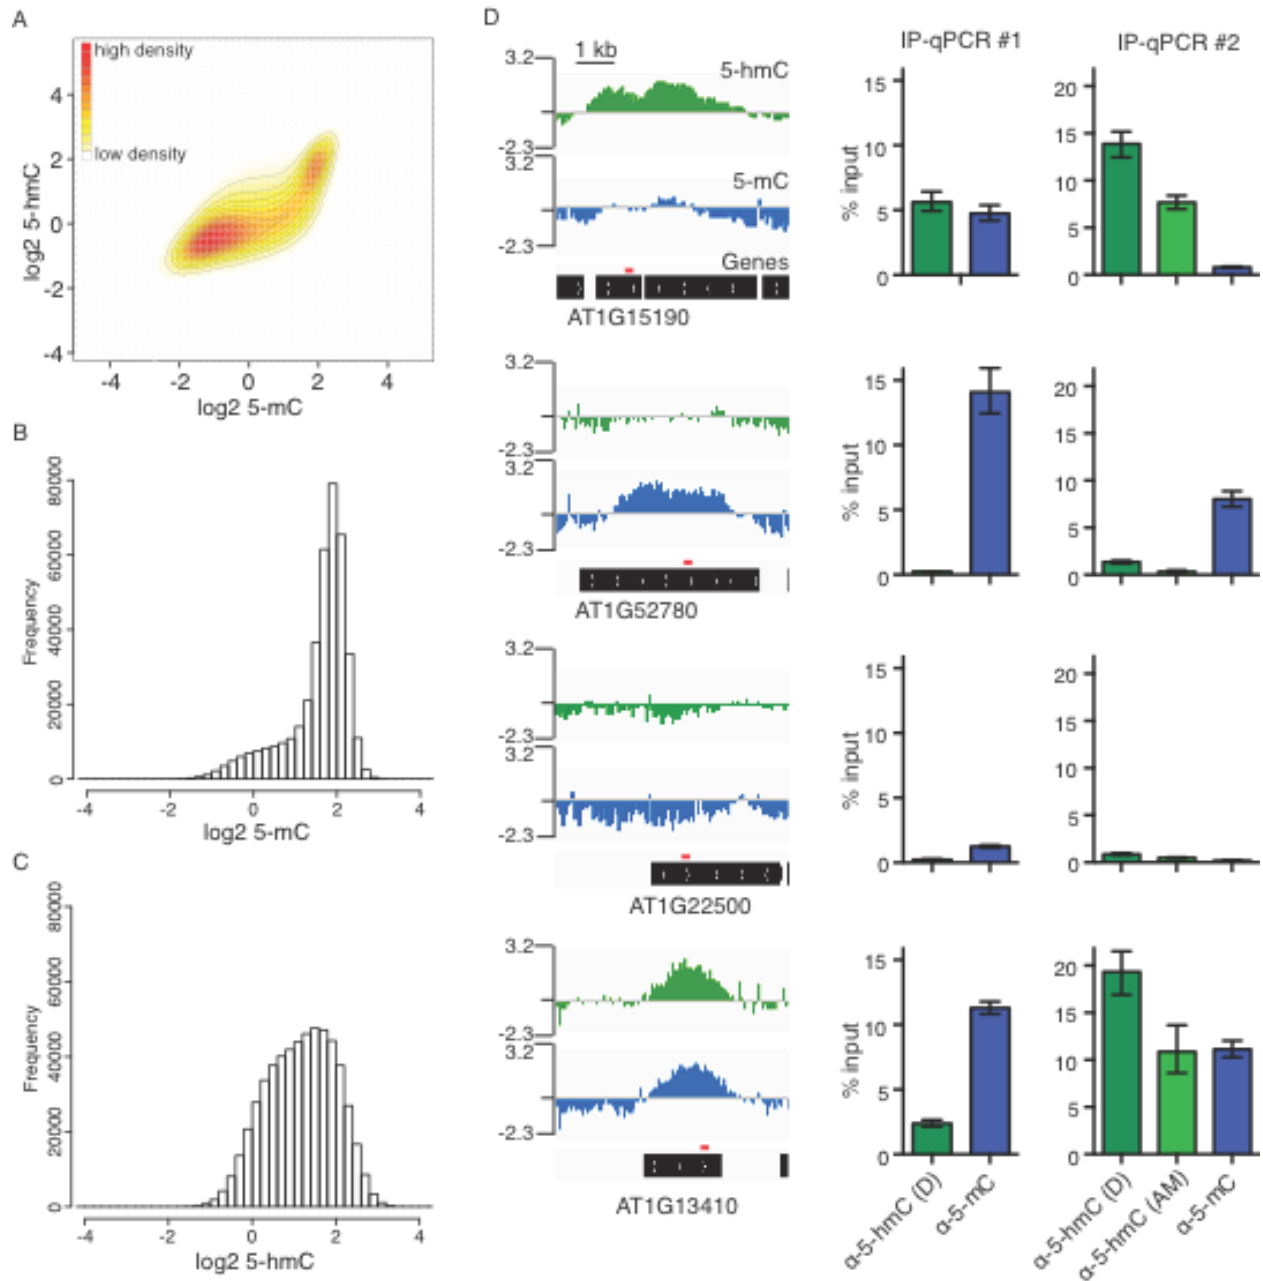

**Figure S2** IP-chip analysis and validation. A) Contour plot illustrating the relative density of log<sub>2</sub> 5-mC vs. log<sub>2</sub> 5-hmC signal points. B) Histogram showing the distribution of log<sub>2</sub> 5-mC values for probes with a log<sub>2</sub> 5-hmC value greater than or equal to 1. C) Histogram showing the distribution of log<sub>2</sub> 5-hmC values for probes with a log<sub>2</sub> 5-mC value greater than or equal to 1. D) Validation of IP-chip by IP-qPCR. Four regions were chosen for validation (green tracks, 5-hmC IP-chip; blue tracks, 5-mC IP-chip; red bars, location of qPCR amplicons). In IP #1, 1.6 μg of sheared DNA from Col-0 flower buds was immunoprecipitated with 4.5 μg of either an α-5-hmC rat monoclonal antibody (Diagenode) or an α-5mC mouse monoclonal antibody (Diagenode). In IP #2, 4 μg of sheared DNA from Col-0 flower buds was immunoprecipitated with 10 μg of either the α-5-hmC rat monoclonal antibody (Diagenode), an α-5-hmC rabbit polyclonal antibody (Active Motif), or the α-5mC mouse monoclonal antibody (Diagenode). IP-qPCR results are expressed as the percent of input DNA. Error bars represent standard deviation of three technical replicates. IP-qPCR #2 used the same input and antibody amounts as the IP-chip experiment, except that the commercial source of the α-5mC mouse monoclonal antibody was different.
